# Supplementary material for: From skylight input to behavioural output: A computational model of the insect polarised light compass
Source: PubMed Central journal article supplement (PMC6638774; doi:10.1371/journal.pcbi.1007123), 2019-07-18
Supplement: pcbi.1007123.s002.pdf [file pcbi.1007123.s002.pdf]

**S2 Appendix. Integrating for infinite SOL-neurons.** The computational model can also be described as a linear combination of the outputs of the POL-OP units. We can merge the SOL and TCL layers, in one by integrating for infinite SOL-neurons. Therefore, the output of each TCL neuron is given by:

$$r_{\text{TCL}}^k = \sum_{j=1}^{n_{\text{POL}}} W^{j,k} \cdot g^j(\theta_t, \phi_t) \cdot r_{\text{POL}}^j$$

where  $W^{j,k}$  is the weight of the synapse connecting the input,  $j$ , and the output,  $k$ . The weights of the model are given by the equation below:

$$W^{j,k} = -\frac{n_{\text{TCL}}}{2 \cdot n_{\text{POL}}} \cdot g^j(\theta_t, \phi_t) \cdot \sin \left[ \left( \phi_{\text{TCL}}^{\text{pref}} \right)^k - \alpha^j \right]$$

where  $\left( \phi_{\text{TCL}}^{\text{pref}} \right)^k$  is the preference angle of the  $k^{\text{th}}$  TCL-neuron. This equation is the result of integrating the two processing steps (SOL and TCL) to one by assuming infinite SOL-neurons. The processing would look like this:

$$r_{\text{TCL}}^k = \sum_{\xi=1}^{n_{\text{SOL}}} W_{\text{TCL}}^{\xi,k} \sum_{j=1}^{n_{\text{POL}}} W_{\text{SOL}}^{j,\xi} \cdot g^j(\theta_t, \phi_t) \cdot r^j$$

where

$$g^j(\theta_t, \phi_t) = \exp \left\{ -\frac{1}{2} \left[ \frac{\sin(\theta_g - \theta^j) \cos(\theta_t) + \cos(\theta_g - \theta^j) \sin(\theta_t) \cos(\phi_t - \phi^j)}{\sigma_g} \right]^2 \right\}$$

$$W_{\text{SOL}}^{j,\xi} = \frac{n_{\text{SOL}}}{n_{\text{POL}}} \cdot \sin \left[ \alpha^j - \left( \phi_{\text{SOL}}^{\text{pref}} \right)^\xi \right]$$

$$W_{\text{TCL}}^{\xi,k} = \frac{n_{\text{TCL}}}{2 \cdot n_{\text{SOL}}} \cos \left[ \left( \phi_{\text{TCL}}^{\text{pref}} \right)^k - \left( \phi_{\text{SOL}}^{\text{pref}} \right)^\xi \right]$$

Integrating for  $\delta = \left( \phi_{\text{SOL}}^{\text{pref}} \right)^\xi$  in the limit where  $n_{\text{SOL}} \rightarrow +\infty$  we have:

$$\begin{aligned} W^{j,k} &= \lim_{n_{\text{SOL}} \rightarrow +\infty} \sum_{\xi=1}^{n_{\text{SOL}}} W_{\text{TCL}}^{\xi,k} W_{\text{SOL}}^{j,\xi} \\ &= \lim_{n_{\text{SOL}} \rightarrow +\infty} \frac{n_{\text{TCL}}}{2 \cdot n_{\text{POL}}} \sum_{j=1}^{n_{\text{CBL}}} \cos \left[ \left( \phi_{\text{TCL}}^{\text{pref}} \right)^k - \delta \right] \sin \left( \alpha^j - \delta \right) \\ &= \frac{n_{\text{TCL}}}{2 \cdot n_{\text{POL}}} \cdot \frac{1}{180^\circ} \int_0^{360^\circ} \cos \left[ \left( \phi_{\text{TCL}}^{\text{pref}} \right)^k - \delta \right] \sin \left( \alpha^j - \delta \right) d\delta \\ &= -\frac{n_{\text{TCL}}}{2 \cdot n_{\text{POL}}} \cdot \sin \left[ \left( \phi_{\text{TCL}}^{\text{pref}} \right)^k - \alpha^j \right] \end{aligned}$$

Using this model we get almost the same result as the two-layered one.
