# Supplementary material for: From skylight input to behavioural output: A computational model of the insect polarised light compass
Source: PubMed Central journal article supplement (PMC6638774; doi:10.1371/journal.pcbi.1007123), 2019-07-18
Supplement: pcbi.1007123.s008.pdf [file pcbi.1007123.s008.pdf]

**Table. Spherical coordinates of the exact positions of the POL units on the dome.**

| ID ( $i$ ) | $\theta^i$ | $\phi^i$ | ID ( $i$ ) | $\theta^i$ | $\phi^i$ | ID ( $i$ ) | $\theta^i$ | $\phi^i$ |
|------------|------------|----------|------------|------------|----------|------------|------------|----------|
| 1          | 5.13       | 45.00    | 21         | 15.39      | -105.00  | 41         | 25.65      | 9.00     |
| 2          | 5.13       | 135.00   | 22         | 15.39      | -75.00   | 42         | 25.65      | 27.00    |
| 3          | 5.13       | -135.00  | 23         | 15.39      | -45.00   | 43         | 25.65      | 45.00    |
| 4          | 5.13       | -45.00   | 24         | 15.39      | -15.00   | 44         | 25.65      | 63.00    |
| 5          | 10.26      | 22.50    | 25         | 20.52      | 11.25    | 45         | 25.65      | 81.00    |
| 6          | 10.26      | 67.50    | 26         | 20.52      | 33.75    | 46         | 25.65      | 99.00    |
| 7          | 10.26      | 112.50   | 27         | 20.52      | 56.25    | 47         | 25.65      | 117.00   |
| 8          | 10.26      | 157.50   | 28         | 20.52      | 78.75    | 48         | 25.65      | 135.00   |
| 9          | 10.26      | -157.50  | 29         | 20.52      | 101.25   | 49         | 25.65      | 153.00   |
| 10         | 10.26      | -112.50  | 30         | 20.52      | 123.75   | 50         | 25.65      | 171.00   |
| 11         | 10.26      | -67.50   | 31         | 20.52      | 146.25   | 51         | 25.65      | -171.00  |
| 12         | 10.26      | -22.50   | 32         | 20.52      | 168.75   | 52         | 25.65      | -153.00  |
| 13         | 15.39      | 15.00    | 33         | 20.52      | -168.75  | 53         | 25.65      | -135.00  |
| 14         | 15.39      | 45.00    | 34         | 20.52      | -146.25  | 54         | 25.65      | -117.00  |
| 15         | 15.39      | 75.00    | 35         | 20.52      | -123.75  | 55         | 25.65      | -99.00   |
| 16         | 15.39      | 105.00   | 36         | 20.52      | -101.25  | 56         | 25.65      | -81.00   |
| 17         | 15.39      | 135.00   | 37         | 20.52      | -78.75   | 57         | 25.65      | -63.00   |
| 18         | 15.39      | 165.00   | 38         | 20.52      | -56.25   | 58         | 25.65      | -45.00   |
| 19         | 15.39      | -165.00  | 39         | 20.52      | -33.75   | 59         | 25.65      | -27.00   |
| 20         | 15.39      | -135.00  | 40         | 20.52      | -11.25   | 60         | 25.65      | -9.00    |

ID ( $i$ ), the identity of the POL unit referring to the figures of the main text;  $\theta^i$ , the zenith distance of the  $i^{\text{th}}$  unit;  $\phi^i$ , the azimuth of the  $i^{\text{th}}$  unit.
